# Supplementary material for: Repurposing drugs to fast-track therapeutic agents for the treatment of cryptococcosis
Source: PubMed Central journal article supplement (PMC5937474; doi:10.7717/peerj.4761), 2018-05-04
Supplement: peerj-06-4761-s001.pdf [file peerj-06-4761-s001.pdf]

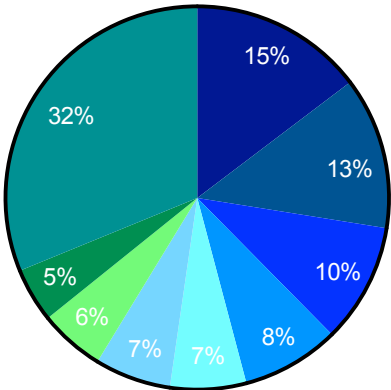

- Antineoplastic
- Antifungal
- Antihypertensive
- Antipsychotic
- Antihistamine
- Antidepressant
- Anthelmintic
- Antiparkinsonian
- Other

**Total = 109**
