# Supplementary material for: Repurposing drugs to fast-track therapeutic agents for the treatment of cryptococcosis
Source: PubMed Central journal article supplement (PMC5937474; doi:10.7717/peerj.4761), 2018-05-04
Supplement: peerj-06-4761-s002.pdf [file peerj-06-4761-s002.pdf]

| No. | Drug                 | Active concentration<br>( $\mu\text{g/mL}$ ) |    | Therapeutic classification |
|-----|----------------------|----------------------------------------------|----|----------------------------|
| 1   | Fluspirilene         |                                              | 10 | Antipsychotic              |
| 2   | Aripiprazole         |                                              | 10 | Antipsychotic              |
| 3   | Fluphenazine         | 40                                           | 10 | Antipsychotic              |
| 4   | Haloperidol          | 40                                           |    | Antipsychotic              |
| 5   | Butaclamol (+)       | 40                                           |    | Antipsychotic              |
| 6   | Trifluoperidol       | 40                                           |    | Antipsychotic              |
| 7   | Trifluoperazine·2HCl | 40                                           | 10 | Antipsychotic              |
| 8   | Thioridazine         | 40                                           | 10 | Antipsychotic              |
| 9   | Clothiapine          | 40                                           |    | Antipsychotic              |
| 10  | Nisoldipine          | 40                                           | 10 | Antihypertensive           |
| 11  | Lacidipine           |                                              | 10 | Antihypertensive           |
| 12  | Methyldopa           | 40                                           | 10 | Antihypertensive           |
| 13  | Naftopidil·2HCl      | 40                                           |    | Antihypertensive           |
| 14  | Felodipine           | 40                                           | 10 | Antihypertensive           |
| 15  | Nifedipine           | 40                                           | 10 | Antihypertensive           |
| 16  | Nitrendipine         | 40                                           |    | Antihypertensive           |
| 17  | Doxazosin            | 40                                           | 10 | Antihypertensive           |
| 18  | Olmesartan           | 40                                           | 10 | Antihypertensive           |
| 19  | Trequinsin·HCl       | 40                                           |    | Antihypertensive           |
| 20  | Fenoldopam           | 40                                           |    | Antihypertensive           |
| 21  | Flubendazole         |                                              | 10 | Anthelmintic               |
| 22  | Albendazole          |                                              | 10 | Anthelmintic               |
| 23  | Oxfendazole          | 40                                           | 10 | Anthelmintic               |
| 24  | Ricobendazole        | 40                                           |    | Anthelmintic               |
| 25  | Quinacrine           | 40                                           | 10 | Anthelmintic               |
| 26  | Fenbendazole         | 40                                           |    | Anthelmintic               |
| 27  | Clemastine           | 40                                           | 10 | Antihistamine              |
| 28  | Terfenadine          | 40                                           | 10 | Antihistamine              |
| 29  | Promethazine         | 40                                           |    | Antihistamine              |
| 30  | Loratadine           | 40                                           |    | Antihistamine              |
| 31  | Cyproheptadine       | 40                                           |    | Antihistamine              |
| 32  | Astemizole           | 40                                           |    | Antihistamine              |
| 33  | Oxatomide            | 40                                           | 10 | Antihistamine              |
| 34  | Amorolfine           | 40                                           | 10 | Antifungal                 |
| 35  | Butenafine           | 40                                           | 10 | Antifungal                 |
| 36  | Sertaconazole        |                                              | 10 | Antifungal                 |
| 37  | Terbinafine          | 40                                           | 10 | Antifungal                 |
| 38  | Nystatin             | 40                                           |    | Antifungal                 |
| 39  | Oxiconazole          |                                              | 10 | Antifungal                 |
| 40  | Myclobutanil         | 40                                           | 10 | Antifungal                 |
| 41  | Miconazole           |                                              | 10 | Antifungal                 |
| 42  | Fluconazole          | 40                                           |    | Antifungal                 |
| 43  | Bifonazole           |                                              | 10 | Antifungal                 |
| 44  | Climbazole           | 40                                           | 10 | Antifungal                 |

|    |                                          |    |    |                    |
|----|------------------------------------------|----|----|--------------------|
| 45 | Butoconazole nitrate                     | 40 | 10 | Antifungal         |
| 46 | Tioconazole                              | 40 |    | Antifungal         |
| 47 | Ketoconazole                             | 40 | 10 | Antifungal         |
| 48 | Carbidopa                                | 40 |    | Antiparkinsonian   |
| 49 | Levodopa                                 | 40 | 10 | Antiparkinsonian   |
| 50 | Entacapone                               | 40 |    | Antiparkinsonian   |
| 51 | Benserazide                              | 40 | 10 | Antiparkinsonian   |
| 52 | Apomorphine R (-)                        | 40 | 10 | Antiparkinsonian   |
| 53 | Imipramine                               | 40 |    | Antidepressant     |
| 54 | Amoxapine                                | 40 |    | Antidepressant     |
| 55 | Mianserin·HCl                            | 40 |    | Antidepressant     |
| 56 | Nefazodone                               | 40 |    | Antidepressant     |
| 57 | Paroxetine                               | 40 |    | Antidepressant     |
| 58 | Fluoxetine                               | 40 |    | Antidepressant     |
| 59 | Maprotiline·HCl                          | 40 |    | Antidepressant     |
| 60 | Vincristine                              | 40 | 10 | Antineoplastic     |
| 61 | Toremifene                               | 40 | 10 | Antineoplastic     |
| 62 | Vindesine sulfate                        | 40 | 10 | Antineoplastic     |
| 63 | Docetaxil                                | 40 | 10 | Antineoplastic     |
| 64 | Vinorelbine                              | 40 |    | Antineoplastic     |
| 65 | Lomustine                                | 40 |    | Antineoplastic     |
| 66 | Camptothecin                             | 40 |    | Antineoplastic     |
| 67 | 5-Fluorouracil                           | 40 | 10 | Antineoplastic     |
| 68 | Idarubicin                               | 40 |    | Antineoplastic     |
| 69 | Aclarubicin                              | 40 |    | Antineoplastic     |
| 70 | Mitoxantrone                             | 40 |    | Antineoplastic     |
| 71 | Tamoxifen                                | 40 | 10 | Antineoplastic     |
| 72 | Bleomycin                                | 40 | 10 | Antineoplastic     |
| 73 | Miltefosine                              | 40 | 10 | Antineoplastic     |
| 74 | Sodium Phenylbutyrate                    | 40 |    | Antineoplastic     |
| 75 | Vinblastine                              | 40 |    | Antineoplastic     |
| 76 | Auranofin                                | 40 | 10 | Antiinflammatory   |
| 77 | Docebenone                               | 40 | 10 | Antiinflammatory   |
| 78 | Capsaicin                                | 40 |    | Analgesic          |
| 79 | Simvastatin                              | 40 |    | Antihyperlipidemic |
| 80 | Cerivastatin                             | 40 | 10 | Antihyperlipidemic |
| 81 | Lorglumide                               | 40 |    | Antiulcerative     |
| 82 | Omeprazole                               | 40 |    | Antiulcerative     |
| 83 | Tacrine                                  | 40 |    | Nootropic          |
| 84 | Idebenone                                | 40 |    | Nootropic          |
| 85 | Melengestrol Acetate                     | 40 |    | Progestogen        |
| 86 | Progesterone                             | 40 |    | Progestogen        |
| 87 | Levallorphan                             | 40 | 10 | Opioid antagonist  |
| 88 | Naltriben<br>methanesulfonate<br>hydrate | 40 | 10 | Opioid antagonist  |

|            |                                       |    |    |                                     |
|------------|---------------------------------------|----|----|-------------------------------------|
| <b>89</b>  | Celecoxib                             | 40 |    | Analgesic                           |
| <b>90</b>  | Fumagillin                            | 40 |    | Antiprotozoal                       |
| <b>91</b>  | Pentamidine                           | 40 |    | Antiprotozoal                       |
| <b>92</b>  | Anethole-trithione                    | 40 | 10 | Choleretic                          |
| <b>93</b>  | Ticlopidine                           | 40 | 10 | Antithrombotic                      |
| <b>94</b>  | Efavirenz                             | 40 | 10 | Antiviral                           |
| <b>95</b>  | Epinephrine-(+)- L (-)                | 40 |    | Bronchodilator,<br>cardiostimulator |
| <b>96</b>  | Norepinephrine-(+)-<br>tartrate L (-) | 40 |    | Antihypotensive                     |
| <b>97</b>  | Vitamin A acetate                     | 40 | 10 | Vitamin                             |
| <b>98</b>  | Riluzole·HCl                          | 40 |    | Neuroprotective                     |
| <b>99</b>  | Harmine                               | 40 |    | CNS stimulant                       |
| <b>100</b> | Flutamide                             | 40 |    | Antiandrogen                        |
| <b>101</b> | Clomiphene                            | 40 | 10 | Gonad stimulant                     |
| <b>102</b> | Flunarizine·2HCl                      |    | 10 | Vasodilator                         |
| <b>103</b> | Artemisinin                           | 40 | 10 | Antimalarial                        |
| <b>104</b> | Disulfiram                            | 40 | 10 | Alcohol deterrent                   |
| <b>105</b> | Leflunomide                           | 40 |    | Antirheumatic                       |
| <b>106</b> | Prothionamide                         | 40 |    | Antitubercular                      |
| <b>107</b> | Chlorpromazine                        | 40 |    | Antiemetic                          |
| <b>108</b> | Lomofungin                            | 40 |    | Antibiotic                          |
| <b>109</b> | Bepidil·HCl                           | 40 |    | Antianginal                         |
