# Supplementary material for: Repurposing drugs to fast-track therapeutic agents for the treatment of cryptococcosis
Source: PubMed Central journal article supplement (PMC5937474; doi:10.7717/peerj.4761), 2018-05-04
Supplement: peerj-06-4761-s003.pdf [file peerj-06-4761-s003.pdf]

| Species                 | Molecular genotype | Strain        | MIC (ug/mL) |          |          |          |       | MFC (ug/mL) |          |          |          |       |
|-------------------------|--------------------|---------------|-------------|----------|----------|----------|-------|-------------|----------|----------|----------|-------|
|                         |                    |               | Rep - 1     | Rep - 2  | Rep - 3  | Rep - 4  | Mode  | Rep - 1     | Rep - 2  | Rep - 3  | Rep - 4  | Mode  |
| <i>C. gattii</i>        | VGI                | ENV316        | 0.078125    | 0.078125 | 0.078125 | -        | 0.078 | 0.1563      | 0.1563   | 0.078125 | -        | 0.156 |
|                         |                    | PNG14         | 0.078125    | 0.039063 | 0.078125 | -        | 0.078 | 0.078125    | 0.078125 | 0.078125 | -        | 0.078 |
|                         |                    | 2005/215      | 0.078125    | 0.078125 | 0.078125 | -        | 0.078 | 0.078125    | 0.078125 | 0.078125 | -        | 0.078 |
|                         |                    | V15/571_103   | 0.078125    | 0.078125 | 0.078125 | -        | 0.078 | 0.078125    | 0.15625  | 0.078125 | -        | 0.078 |
| <i>C. deuterogattii</i> | VGII               | 97/170        | 0.078125    | 0.078125 | 0.078125 | -        | 0.078 | 0.078125    | 0.078125 | 0.078125 | -        | 0.078 |
|                         |                    | R265          | 0.078125    | 0.078125 | 0.078125 | -        | 0.078 | 0.078125    | 0.078125 | 0.078125 | -        | 0.078 |
|                         |                    | CBS1930       | 0.039063    | 0.078125 | 0.078125 | -        | 0.078 | 0.078125    | 0.078125 | 0.078125 | -        | 0.078 |
|                         |                    | ICB184        | 0.039063    | 0.039063 | 0.039063 | -        | 0.039 | 0.039063    | 0.039063 | 0.039063 | -        | 0.039 |
|                         |                    | 14.1431       | 0.039063    | 0.019531 | 0.039063 | -        | 0.039 | 0.078125    | 0.039063 | 0.078125 | -        | 0.078 |
|                         |                    | LA499         | 0.039063    | 0.019531 | 0.039063 | -        | 0.039 | 0.039063    | 0.039063 | 0.039063 | -        | 0.039 |
|                         |                    | V5            | 0.039063    | 0.039063 | 0.078125 | 0.019531 | 0.039 | 0.078125    | 0.039063 | 0.078125 | 0.039063 | 0.078 |
|                         |                    | 03-201073     | 0.078125    | 0.039063 | 0.078125 | 0.039063 | 0.078 | 0.078125    | 0.078125 | 0.078125 | 0.078125 | 0.078 |
| <i>C. bacillisporus</i> | VGIII              | VBP62270      | 0.039063    | 0.078125 | 0.078125 | -        | 0.078 | 0.078125    | 0.078125 | 0.078125 | -        | 0.078 |
|                         |                    | 97/427        | 0.15625     | 0.15625  | 0.15625  | -        | 0.156 | 0.01563     | 0.3125   | 0.3125   | -        | 0.313 |
|                         |                    | WM161         | 0.078125    | 0.15625  | 0.15625  | -        | 0.156 | 0.0781      | 0.15625  | 0.15625  | -        | 0.156 |
|                         |                    | B13C          | 0.078125    | 0.15625  | 0.078125 | -        | 0.078 | 0.15625     | 0.15625  | 0.078125 | -        | 0.16  |
| <i>C. tetragattii</i>   | VGIV               | MMRL3013      | 0.078125    | 0.15625  | 0.039063 | -        | -     | 0.078125    | 0.15625  | 0.039063 | -        | -     |
|                         |                    | M250          | 0.15625     | 0.3125   | 0.15625  | -        | 0.156 | 0.15625     | 0.3125   | 0.15625  | -        | 0.16  |
|                         |                    | WM779         | 0.039063    | 0.078125 | 0.078125 | -        | 0.078 | 0.078125    | 0.15625  | 0.078125 | -        | 0.08  |
|                         |                    | MMRL2650      | 0.039063    | 0.039063 | 0.039063 | -        | 0.039 | 0.078125    | 0.078125 | 0.078125 | -        | 0.078 |
| <i>C. neoformans</i>    | VNI                | 1043.ENR.STOR | 0.078125    | 0.078125 | 0.078125 | -        | 0.078 | 0.15625     | 0.078125 | 0.15625  | -        | 0.156 |
|                         |                    | 1020.CLIN1    | 0.078125    | 0.039063 | 0.039063 | -        | 0.039 | 0.078125    | 0.078125 | 0.078125 | -        | 0.078 |
|                         |                    | H99           | 0.039063    | 0.019531 | 0.039063 | 0.019531 | 0.039 | 0.039063    | 0.039063 | 0.039063 | 0.019531 | 0.039 |
|                         |                    | WM625         | 0.019531    | 0.019531 | 0.039063 | 0.019531 | 0.020 | 0.078125    | 0.039063 | 0.039063 | 0.039063 | 0.039 |
|                         |                    | WM385         | 0.039063    | 0.039063 | 0.078125 | 0.039063 | 0.039 | 0.039063    | 0.019531 | 0.039063 | 0.039063 | 0.039 |
| <i>C. neoformans</i>    | VNII               | 1023.ENR      | 0.039063    | 0.039063 | 0.039063 | -        | 0.039 | 0.078125    | 0.078125 | 0.078125 | -        | 0.078 |
|                         |                    | 1045.ENR.STOR | 0.078125    | 0.078125 | 0.039063 | -        | 0.078 | 0.15625     | 0.15625  | 0.15625  | -        | 0.156 |
| <i>C. neoformans</i>    | VNBI               | 1050.ENR.CLIN | 0.078125    | 0.15625  | 0.078125 | -        | 0.078 | 0.15625     | 0.15625  | 0.15625  | -        | 0.156 |
| <i>C. neoformans</i>    | VNBII              | 1033.ENR      | 0.039063    | 0.039063 | 0.039063 | -        | 0.039 | 0.078125    | 0.078125 | 0.078125 | -        | 0.078 |
|                         |                    | 1052.ENR.STOR | 0.039063    | 0.039063 | 0.039063 | -        | 0.039 | 0.078125    | 0.078125 | 0.039063 | -        | 0.078 |

|  |                 |          |          |          |   |       |          |          |          |   |       |
|--|-----------------|----------|----------|----------|---|-------|----------|----------|----------|---|-------|
|  | 1049.THER1.STOR | 0.039063 | 0.039063 | 0.039063 | - | 0.039 | 0.039063 | 0.078125 | 0.039063 | - | 0.039 |
|--|-----------------|----------|----------|----------|---|-------|----------|----------|----------|---|-------|
