# Supplementary material for: Repurposing drugs to fast-track therapeutic agents for the treatment of cryptococcosis
Source: PubMed Central journal article supplement (PMC5937474; doi:10.7717/peerj.4761), 2018-05-04
Supplement: peerj-06-4761-s004.pdf [file peerj-06-4761-s004.pdf]

| <b>Time (hr)</b> | <b>Control (CFU/mL)</b> |          |          |          | <b>Flubendazole 0.06 µg/mL (CFU/mL)</b> |          |          |          |
|------------------|-------------------------|----------|----------|----------|-----------------------------------------|----------|----------|----------|
| 0                | 4.45E+06                | 3.05E+06 | 4.25E+06 | 4.05E+06 | 4.45E+06                                | 3.05E+06 | 4.25E+06 | 4.05E+06 |
| 2                | 5.40E+06                | 6.95E+06 | 8.05E+06 | 6.45E+06 | 7.35E+06                                | 6.40E+06 | 8.65E+06 | 7.85E+06 |
| 3                | 8.65E+06                | 7.60E+06 | 1.01E+07 | 9.30E+06 | 7.00E+06                                | 9.30E+06 | 7.65E+06 | 8.60E+06 |
| 4                | 1.30E+07                | 1.10E+07 | 1.45E+07 | 1.18E+07 | 1.08E+07                                | 9.90E+06 | 1.04E+07 | 9.60E+06 |
| 5                | 1.33E+07                | 1.41E+07 | 1.97E+07 | 1.55E+07 | 1.02E+07                                | 9.75E+06 | 1.14E+07 | 1.01E+07 |
| 6                | 2.18E+07                | 1.79E+07 | 2.12E+07 | 2.18E+07 | 1.19E+07                                | 1.32E+07 | 1.35E+07 | 1.35E+07 |
| 9                | 4.70E+07                | 4.75E+07 | 5.35E+07 | 4.75E+07 | 1.61E+07                                | 2.21E+07 | 1.96E+07 | 1.74E+07 |
| 24               | 6.25E+07                | 6.45E+07 | 8.10E+07 | 6.85E+07 | 1.03E+07                                | 1.42E+07 | 1.29E+07 | 8.30E+06 |
