# Supplementary material for: Repurposing drugs to fast-track therapeutic agents for the treatment of cryptococcosis
Source: PubMed Central journal article supplement (PMC5937474; doi:10.7717/peerj.4761), 2018-05-04
Supplement: peerj-06-4761-s006.pdf [file peerj-06-4761-s006.pdf]

*C. deuterogattii* R265 – replicate 1

| Drug A | MIC alone (µg/mL) <sup>a</sup> | MIC combo (µg/mL) <sup>b</sup> |         |         |          |          |
|--------|--------------------------------|--------------------------------|---------|---------|----------|----------|
|        |                                | FLB                            | MEB     | BEN     |          |          |
| AMB    | 1                              | 0.5                            | 0.5     | 0.5     |          |          |
| FLC    | 8                              | 8                              | 4       | 8       |          |          |
| ITZ    | 2                              | 1                              | 1       | 1       |          |          |
| VOR    | 0.5                            | 0.25                           | 0.25    | 0.25    |          |          |
| 5FC    | 16                             | 8                              | 8       | 8       |          |          |
| Drug B | MIC alone (µg/mL) <sup>a</sup> | MIC combo (µg/mL) <sup>c</sup> |         |         |          |          |
|        |                                | AMB                            | FLC     | ITZ     | VOR      | 5FC      |
| FLB    | 0.078125                       | 0.078125                       | 0.15625 | 0.15625 | 0.078125 | 0.078125 |
| MEB    | 0.078125                       | 0.078125                       | 0.15625 | 0.15625 | 0.078125 | 0.078125 |
| BEN    | 10                             | 5                              | 5       | 10      | 5        | 5        |

*C. deuterogattii* R265 – replicate 2

| Drug A | MIC alone (µg/mL) <sup>a</sup> | MIC combo (µg/mL) <sup>b</sup> |          |          |          |          |
|--------|--------------------------------|--------------------------------|----------|----------|----------|----------|
|        |                                | FLB                            | MEB      | BEN      |          |          |
| AMB    | 0.25                           | 0.5                            | 0.5      | 0.5      |          |          |
| FLC    | 4                              | 4                              | 4        | 4        |          |          |
| ITZ    | 0.5                            | 0.25                           | 0.25     | 0.5      |          |          |
| VOR    | 0.25                           | 0.125                          | 0.125    | 0.125    |          |          |
| 5FC    | 8                              | 4                              | 8        | 8        |          |          |
| Drug B | MIC alone (µg/mL) <sup>a</sup> | MIC combo (µg/mL) <sup>c</sup> |          |          |          |          |
|        |                                | AMB                            | FLC      | ITZ      | VOR      | 5FC      |
| FLB    | 0.078125                       | 0.078125                       | 0.078125 | 0.078125 | 0.039063 | 0.039063 |
| MEB    | 0.15625                        | 0.078125                       | 0.078125 | 0.078125 | 0.039063 | 0.078125 |
| BEN    | 20                             | 5                              | 5        | 5        | 2.5      | 5        |
